# Supplementary material for: Fe@CNT-monoliths for the conversion of carbon dioxide to hydrocarbons: structural characterisation and Fischer–Tropsch reactivity investigations
Source: Royal Society of Chemistry journal article supplement (doi:10.1039/c4cy00616j), 2014-01-01
Supplement: c4cy00616j1.pdf [file c4cy00616j1.pdf]

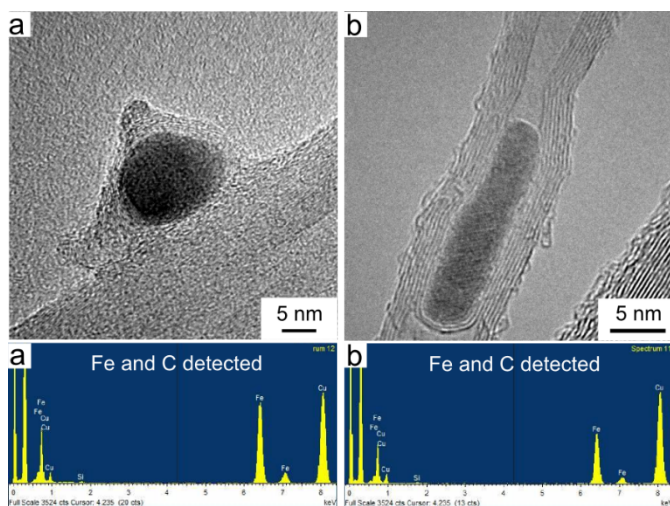

Figure S1 TEM micrographs of the two iron environments and elemental analysis a) outside of the tube, coated in a graphitic layer and b) inside the tube
